# Supplementary material for: Uricase-deficient rats with similarly stable serum uric acid to human’s are sensitive model animals for studying hyperuricemia
Source: PLoS One. 2022 Mar 3;17(3):e0264696. doi: 10.1371/journal.pone.0264696 (PMC8893661; doi:10.1371/journal.pone.0264696)
Supplement: S1 Table — (XLS) [file pone.0264696.s007.xls]

## Sheet: duo
Gene ID	Gene Name	Product	FPKM(WT1)	FPKM(WT3)	FPKM(WT2)	FPKM (Uox-/-1)	FPKM (Uox-/-2)	FPKM (Uox-/-3)	mean(WT)	mean(Uox-/-)	T-test	SDWT	SDUox	Pos.	note	signal
ENSRNOG00000010064	Abcc4	ATP-binding cassette%2C subfamily C (CFTR/MRP)%2C member 4 [Source:RGD Symbol;Acc:620266]	0.92	0.96	1.5	2.12112	1.15137	1.06149	1.12667	1.44466	0.457802	0.323934	0.587552	15[-]103696557-103927592	secretion	+
ENSRNOG00000007041	Abcg2	ATP-binding cassette%2C subfamily G (WHITE)%2C member 2 [Source:RGD Symbol;Acc:631345]	82.05	72.84	56.44	47.4272	87.8645	77.0699	70.4433	70.7872	0.981865	12.9721	20.938	4[+]88832178-88890621	secretion	+
ENSRNOG00000010265	Ada	adenosine deaminase [Source:RGD Symbol;Acc:2031]	1628.08	1684.54	1072.94	575.941	626.667	492.527	1461.85	565.045	0.0107716	337.99	67.7307	3[-]160115842-160139947	synthesis	+
ENSRNOG00000015354	Aox1	aldehyde oxidase 1 [Source:RGD Symbol;Acc:620528]	0.72	0.23	0.45	0.779312	0.911937	0.649498	0.466667	0.780249	0.122729	0.245425	0.131222	9[+]64929721-65007870	synthesis	+
ENSRNOG00000014405	Aprt	adenine phosphoribosyl transferase [Source:RGD Symbol;Acc:1307758]	260.48	257.62	270.47	170.895	215.525	143.164	262.857	176.528	0.0157665	6.74663	36.5082	19[-]55387288-55389256	synthesis	+
ENSRNOG00000048561	Hprt1	hypoxanthine phosphoribosyltransferase 1 [Source:RGD Symbol;Acc:2826]	14.59	10.18	17.95	11.0754	10.8369	9.91436	14.24	10.6089	0.186087	3.89681	0.61319	X[-]158197149-158228749	synthesis	+
ENSRNOG00000012681	Lgals9	lectin%2C galactoside-binding%2C soluble%2C 9 [Source:RGD Symbol;Acc:3005]	443.35	335.9	523.67	363.066	434.376	296.112	434.307	364.518	0.359399	94.2111	69.1436	10[+]64737022-64760201	secretion	+
ENSRNOG00000009982	Pnp	purine nucleoside phosphorylase [Source:RGD Symbol;Acc:1597189]	284.16	266	299.76	226.249	308.55	243.458	283.307	259.419	0.424621	16.8962	43.4101	15[+]27875911-27883350	synthesis	+
ENSRNOG00000042692	Slc17a1	solute carrier family 17 (organic anion transporter)%2C member 1 [Source:RGD Symbol;Acc:620099]	0	0	0	0	0	0	0	0	#DIV/0!	0	0	17[-]43477600-43504604	secretion	+
ENSRNOG00000021108	Slc22a12	solute carrier family 22 (organic anion/urate transporter)%2C member 12 [Source:RGD Symbol;Acc:621628]	0	0	0	0	0	0	0	0	#DIV/0!	0	0	1[-]221910767-221919301	intake	+
ENSRNOG00000056476	Slc22a13	solute carrier family 22 (organic anion/urate transporter)%2C member 13 [Source:RGD Symbol;Acc:1306840]	0.15	0.08	0.2	0.093806	0.195088	0.045445	0.143333	0.111446	0.60059	0.0602771	0.0763652	8[-]127885268-127900463	intake	+
ENSRNOG00000018215	Slc22a6	solute carrier family 22 (organic anion transporter)%2C member 6 [Source:RGD Symbol;Acc:69338]	0	0	0	0	0	0.016962	0	0.005654	0.373901	0	0.00979302	1[+]224824799-224833259	secretion	+
ENSRNOG00000018086	Slc22a8	solute carrier family 22 (organic anion transporter)%2C member 8 [Source:RGD Symbol;Acc:632286]	0	0	0	0	0	0.010292	0	0.00343067	0.373901	0	0.00594209	1[+]224800252-224818482	intake	+
ENSRNOG00000005900	Slc2a6	solute carrier family 2 (facilitated glucose transporter)%2C member 6 [Source:RGD Symbol;Acc:1309317]	1.55	2.04	1.5	2.11424	2.32067	2.02306	1.69667	2.15266	0.0779183	0.298385	0.152482	3[-]5568321-5575136	intake	+
ENSRNOG00000005302	Slc2a9	solute carrier family 2 (facilitated glucose transporter)%2C member 9 [Source:RGD Symbol;Acc:1597012]	13.82	18.24	13.79	9.18473	13.5715	6.78283	15.2833	9.84634	0.0931699	2.56059	3.44233	14[+]77067503-77192702	intake	+
ENSRNOG00000016339	Uox	urate oxidase [Source:RGD Symbol;Acc:621369]	0	0	0.05	0	0	0	0.0166667	0	0.373901	0.0288675	0	2[+]252452269-252488396	degradation	+
ENSRNOG00000007081	Xdh	xanthine dehydrogenase [Source:RGD Symbol;Acc:62043]	279.75	254.81	251.07	193.058	254.473	198.813	261.877	215.448	0.0975248	15.5913	33.919	6[-]25149235-25211494	synthesis	+
ENSRNOG00000018282	Gda	guanine deaminase [Source:RGD Symbol;Acc:621617]	120.68	69.04	73.04	200.568	216.798	189.69	87.5867	202.352	0.00334095	28.7294	13.6416	K01487-ko00230 Purine metabolism	synthesis	+
	Gene Name	mean(WT)	mean(Uox-/-)	T-test	note
	Abcc4	1.12666666666667+0.323934149686836	1.44465766666666+0.587551551563211	0.457802	secretion
	Abcg2	70.4433333333333+12.9721252435109	70.787224+20.9379686781703	0.981865	secretion
	Ada	1461.85333333333+337.989820162285	565.045044+67.7306530548079	0.0107716	synthesis
	Aox1	0.466666666666667+0.245424801789333	0.780249+0.131222009041929	0.122729	synthesis
	Aprt	262.856666666667+6.74663125814161	176.528132333333+36.5082189536859	0.0157665	synthesis
	Hprt1	14.24+3.8968063847207	10.608892+0.613189954125963	0.186087	synthesis
	Lgals9	434.306666666667+94.2110908191458	364.518046+69.1435856667643	0.359399	secretion
	Pnp	283.306666666667+16.8961691910721	259.419275999999+43.4101232194828	0.424621	synthesis
	Slc17a1	0+0	0+0	#DIV/0!	secretion
	Slc22a12	0+0	0+0	#DIV/0!	intake
	Slc22a13	0.143333333333333+0.0602771377334171	0.111446333333333+0.0763651941812062	0.60059	intake
	Slc22a6	0+0	0.005654+0.00979301526599443	0.373901	secretion
	Slc22a8	0+0	0.00343066666666667+0.00594208897049963	0.373901	intake
	Slc2a6	1.69666666666667+0.298384539367129	2.15265766666667+0.152481805709184	0.0779183	intake
	Slc2a9	15.2833333333333+2.56059237937889	9.84633966666663+3.44233444600898	0.0931699	intake
	Uox	0.0166666666666667+0.0288675134594813	0+0	0.373901	degradation
	Xdh	261.876666666667+15.5913095451708	215.448089666667+33.9189727061141	0.0975248	synthesis
	Gda	87.5866666666667+28.7293670889794	202.351862666666+13.6416208324502	0.00334095	synthesis

## Sheet: ileum
Gene ID	Gene Name	Product	FPKM(WT1)	FPKM(WT3)	FPKM(WT2)	FPKM (Uox-/-1)	FPKM (Uox-/-2)	FPKM (Uox-/-3)	mean(WT)	mean(Uox-/-)	T-test	SDWT	SDUox	Pos.	note	signal
ENSRNOG00000010064	Abcc4	ATP-binding cassette%2C subfamily C (CFTR/MRP)%2C member 4 [Source:RGD Symbol;Acc:620266]	2.63	2.38	3.21	2.25569	2.08749	2.61195	2.74	2.31838	0.220187	0.425793	0.267791	15[-]103696557-103927592	secretion	+
ENSRNOG00000007041	Abcg2	ATP-binding cassette%2C subfamily G (WHITE)%2C member 2 [Source:RGD Symbol;Acc:631345]	210.35	215.26	205.06	164.985	186.564	163.177	210.223	171.575	0.00871422	5.10118	13.0121	4[+]88832178-88890621	secretion	+
ENSRNOG00000010265	Ada	adenosine deaminase [Source:RGD Symbol;Acc:2031]	286.29	140.73	263.98	131.556	167.403	88.3296	230.333	129.096	0.116581	78.3964	39.5939	3[-]160115842-160139947	synthesis	+
ENSRNOG00000015354	Aox1	aldehyde oxidase 1 [Source:RGD Symbol;Acc:620528]	1.08	1.58	7.83	1.00691	1.33731	1.48443	3.49667	1.27622	0.365231	3.76109	0.244552	9[+]64929721-65007870	synthesis	+
ENSRNOG00000014405	Aprt	adenine phosphoribosyl transferase [Source:RGD Symbol;Acc:1307758]	127.22	126.47	134.95	69.0184	70.6792	79.8033	129.547	73.167	0.000197372	4.69443	5.8069	19[-]55387288-55389256	synthesis	+
ENSRNOG00000048561	Hprt1	hypoxanthine phosphoribosyltransferase 1 [Source:RGD Symbol;Acc:2826]	15.16	14.44	19.14	11.7278	9.92522	11.7889	16.2467	11.1473	0.0323159	2.53143	1.05881	X[-]158197149-158228749	synthesis	+
ENSRNOG00000012681	Lgals9	lectin%2C galactoside-binding%2C soluble%2C 9 [Source:RGD Symbol;Acc:3005]	441.57	387.81	362.02	366.793	385.634	393.826	397.133	382.085	0.576172	40.5863	13.8617	10[+]64737022-64760201	secretion	+
ENSRNOG00000009982	Pnp	purine nucleoside phosphorylase [Source:RGD Symbol;Acc:1597189]	109.36	125.62	119.94	100.062	104.978	105.377	118.307	103.472	0.0427805	8.25214	2.95984	15[+]27875911-27883350	synthesis	+
ENSRNOG00000042692	Slc17a1	solute carrier family 17 (organic anion transporter)%2C member 1 [Source:RGD Symbol;Acc:620099]	0	0	0	0.099683	0.110803	0.069602	0	0.0933627	0.00161911	0	0.0213153	17[-]43477600-43504604	secretion	+
ENSRNOG00000021108	Slc22a12	solute carrier family 22 (organic anion/urate transporter)%2C member 12 [Source:RGD Symbol;Acc:621628]	0.18	0.25	0	0.008055	0.040913	0	0.143333	0.0163227	0.167832	0.12897	0.0216734	1[-]221910767-221919301	intake	+
ENSRNOG00000056476	Slc22a13	solute carrier family 22 (organic anion/urate transporter)%2C member 13 [Source:RGD Symbol;Acc:1306840]	0.4	0.25	0	0	0	0	0.216667	0	0.136852	0.202073	0	8[-]127885268-127900463	intake	+
ENSRNOG00000018215	Slc22a6	solute carrier family 22 (organic anion transporter)%2C member 6 [Source:RGD Symbol;Acc:69338]	0.04	0	0	0	0.010561	0.021628	0.0133333	0.0107297	0.868224	0.023094	0.010815	1[+]224824799-224833259	secretion	+
ENSRNOG00000018086	Slc22a8	solute carrier family 22 (organic anion transporter)%2C member 8 [Source:RGD Symbol;Acc:632286]	0.04	0	0.04	0.074678	0.091515	0.04984	0.0266667	0.072011	0.0654959	0.023094	0.0209651	1[+]224800252-224818482	intake	+
ENSRNOG00000005900	Slc2a6	solute carrier family 2 (facilitated glucose transporter)%2C member 6 [Source:RGD Symbol;Acc:1309317]	1.36	1.59	1.88	2.14265	2.23815	2.36509	1.61	2.24863	0.0175087	0.260576	0.11159	3[-]5568321-5575136	intake	+
ENSRNOG00000005302	Slc2a9	solute carrier family 2 (facilitated glucose transporter)%2C member 9 [Source:RGD Symbol;Acc:1597012]	17.27	31.64	23.77	14.934	18.221	13.2028	24.2267	15.4526	0.117354	7.19588	2.54895	14[+]77067503-77192702	intake	+
ENSRNOG00000016339	Uox	urate oxidase [Source:RGD Symbol;Acc:621369]	0.16	0.04	0.05	0	0	0	0.0833333	0	0.096049	0.0665833	0	2[+]252452269-252488396	degradation	+
ENSRNOG00000007081	Xdh	xanthine dehydrogenase [Source:RGD Symbol;Acc:62043]	85.27	105.74	78.2	84.4283	87.068	81.5066	89.7367	84.3343	0.555713	14.303	2.78188	6[-]25149235-25211494	synthesis	+
ENSRNOG00000018282	Gda	guanine deaminase [Source:RGD Symbol;Acc:621617]	121.79	101.81	101.83	141.097	131.226	139.846	108.477	137.39	0.017006	11.5297	5.37464	K01487-ko00230 Purine metabolism	synthesis	+
	Gene Name	mean(WT)	mean(Uox-/-)	T-test	note
	Abcc4	2.74+0.425793377120878	2.31837633333333+0.267790718827848	0.220187	secretion
	Abcg2	210.223333333333+5.10117960214432	171.575022333333+13.012148200568	0.00871422	secretion
	Ada	230.333333333333+78.3964414583554	129.096181333333+39.5938992641698	0.116581	synthesis
	Aox1	3.49666666666667+3.76109469879892	1.27621866666667+0.244551603990516	0.365231	synthesis
	Aprt	129.546666666667+4.69442577248094	73.1669616666667+5.8069017091005	0.000197372	synthesis
	Hprt1	16.2466666666667+2.53142910888954	11.1473213333333+1.05880930072055	0.0323159	synthesis
	Lgals9	397.133333333333+40.5862542412248	382.084706333333+13.8617400027951	0.576172	secretion
	Pnp	118.306666666667+8.2521350772593	103.472330666667+2.95983561580138	0.0427805	synthesis
	Slc17a1	0+0	0.0933626666666667+0.0213152658987246	0.00161911	secretion
	Slc22a12	0.143333333333333+0.128970280814354	0.0163226666666667+0.0216733506023719	0.167832	intake
	Slc22a13	0.216666666666667+0.202072594216369	0+0	0.136852	intake
	Slc22a6	0.0133333333333333+0.023094010767585	0.0107296666666667+0.0108149864694013	0.868224	secretion
	Slc22a8	0.0266666666666667+0.023094010767585	0.072011+0.0209651156209549	0.0654959	intake
	Slc2a6	1.61+0.260576284415908	2.24862933333333+0.111589799553245	0.0175087	intake
	Slc2a9	24.2266666666667+7.1958761338237	15.4525876666667+2.54894507118719	0.117354	intake
	Uox	0.0833333333333333+0.066583281184794	0+0	0.096049	degradation
	Xdh	89.7366666666667+14.3030148337102	84.3342996666666+2.78187646042996	0.555713	synthesis
	Gda	108.476666666667+11.529689212348	137.389811+5.37464430719141	0.017006	synthesis

## Sheet: kidney
Gene ID	Gene Name	Product	FPKM(WT1)	FPKM(WT3)	FPKM(WT2)	FPKM (Uox-/-1)	FPKM (Uox-/-2)	FPKM (Uox-/-3)	mean(WT)	mean(Uox-/-)	T-test	SDWT	SDUox	Pos.	note	signal
ENSRNOG00000010064	Abcc4	ATP-binding cassette%2C subfamily C (CFTR/MRP)%2C member 4 [Source:RGD Symbol;Acc:620266]	16.72	15.41	19.38	15.0836	13.8576	12.7356	17.17	13.8922	0.0722035	2.02289	1.17436	15[-]103696557-103927592	secretion	+
ENSRNOG00000007041	Abcg2	ATP-binding cassette%2C subfamily G (WHITE)%2C member 2 [Source:RGD Symbol;Acc:631345]	67.1	63.84	82.62	82.9763	86.8722	69.8568	71.1867	79.9018	0.32368	10.0348	8.91462	4[+]88832178-88890621	secretion	+
ENSRNOG00000010265	Ada	adenosine deaminase [Source:RGD Symbol;Acc:2031]	10.61	7.29	10.87	6.14021	9.0224	8.86506	9.59	8.00923	0.346929	1.9961	1.62052	3[-]160115842-160139947	synthesis	+
ENSRNOG00000015354	Aox1	aldehyde oxidase 1 [Source:RGD Symbol;Acc:620528]	4.45	4.41	3.26	1.91945	2.94316	4.60416	4.04	3.15559	0.368896	0.675796	1.3549	9[+]64929721-65007870	synthesis	+
ENSRNOG00000014405	Aprt	adenine phosphoribosyl transferase [Source:RGD Symbol;Acc:1307758]	145.89	150.47	163.93	71.9786	91.2369	107.024	153.43	90.08	0.00527948	9.37719	17.5515	19[-]55387288-55389256	synthesis	+
ENSRNOG00000048561	Hprt1	hypoxanthine phosphoribosyltransferase 1 [Source:RGD Symbol;Acc:2826]	27.04	27.69	29.61	14.6375	15.5478	16.899	28.1133	15.6948	0.000254573	1.33628	1.13789	X[-]158197149-158228749	synthesis	+
ENSRNOG00000012681	Lgals9	lectin%2C galactoside-binding%2C soluble%2C 9 [Source:RGD Symbol;Acc:3005]	12.41	16.32	12.13	5.41046	7.97022	8.82008	13.62	7.40025	0.0214736	2.34246	1.77483	10[+]64737022-64760201	secretion	+
ENSRNOG00000009982	Pnp	purine nucleoside phosphorylase [Source:RGD Symbol;Acc:1597189]	143.93	143.75	149.21	98.4268	120.658	111.114	145.63	110.066	0.00600073	3.10168	11.1527	15[+]27875911-27883350	synthesis	+
ENSRNOG00000042692	Slc17a1	solute carrier family 17 (organic anion transporter)%2C member 1 [Source:RGD Symbol;Acc:620099]	39.83	43.02	49.18	52.9526	49.4054	61.1141	44.01	54.4907	0.076769	4.75297	6.00393	17[-]43477600-43504604	secretion	+
ENSRNOG00000021108	Slc22a12	solute carrier family 22 (organic anion/urate transporter)%2C member 12 [Source:RGD Symbol;Acc:621628]	380.89	374.28	435.79	252.321	334.277	268.645	396.987	285.081	0.0243215	33.7668	43.3801	1[-]221910767-221919301	intake	+
ENSRNOG00000056476	Slc22a13	solute carrier family 22 (organic anion/urate transporter)%2C member 13 [Source:RGD Symbol;Acc:1306840]	10.65	9.05	15.3	3.45195	3.44122	3.35426	11.6667	3.41581	0.011681	3.24666	0.0535693	8[-]127885268-127900463	intake	+
ENSRNOG00000018215	Slc22a6	solute carrier family 22 (organic anion transporter)%2C member 6 [Source:RGD Symbol;Acc:69338]	555.03	501.17	569.58	458.051	499.594	559.841	541.927	505.829	0.374397	36.0382	51.1807	1[+]224824799-224833259	secretion	+
ENSRNOG00000018086	Slc22a8	solute carrier family 22 (organic anion transporter)%2C member 8 [Source:RGD Symbol;Acc:632286]	388.6	352.47	446.26	397.262	457.47	445.413	395.777	433.382	0.317149	47.3051	31.8563	1[+]224800252-224818482	intake	+
ENSRNOG00000005900	Slc2a6	solute carrier family 2 (facilitated glucose transporter)%2C member 6 [Source:RGD Symbol;Acc:1309317]	1.01	1.09	0.98	0.818821	0.98431	0.824898	1.02667	0.87601	0.0761377	0.0568624	0.09384	3[-]5568321-5575136	intake	+
ENSRNOG00000005302	Slc2a9	solute carrier family 2 (facilitated glucose transporter)%2C member 9 [Source:RGD Symbol;Acc:1597012]	6.83	7.55	7.24	7.20215	7.91612	7.75563	7.20667	7.62463	0.236517	0.361156	0.374576	14[+]77067503-77192702	intake	+
ENSRNOG00000016339	Uox	urate oxidase [Source:RGD Symbol;Acc:621369]	0	0.1	0	0	0.024994	0	0.0333333	0.00833133	0.50712	0.057735	0.0144303	2[+]252452269-252488396	degradation	+
ENSRNOG00000007081	Xdh	xanthine dehydrogenase [Source:RGD Symbol;Acc:62043]	34.95	31.94	39.47	34.0536	38.0797	41.7285	35.4533	37.9539	0.467053	3.79015	3.83896	6[-]25149235-25211494	synthesis	+
ENSRNOG00000018282	Gda	guanine deaminase [Source:RGD Symbol;Acc:621617]	5.48	4.36	7.39	8.60535	6.8343	9.25398	5.74333	8.23121	0.0950022	1.53207	1.25248	K01487-ko00230 Purine metabolism	synthesis	+
	Gene Name	mean(WT)	mean(Uox-/-)	T-test	note
	Abcc4	17.17+2.02289396657363	13.892245+1.1743585029151	0.0722035	secretion
	Abcg2	71.1866666666667+10.034826024069	79.9017996666666+8.91461545266669	0.32368	secretion
	Ada	9.59+1.99609619006701	8.00922533333333+1.62052291916108	0.346929	synthesis
	Aox1	4.04+0.675795827154922	3.155592+1.35490113756576	0.368896	synthesis
	Aprt	153.43+9.37718507868967	90.079961+17.5515460306851	0.00527948	synthesis
	Hprt1	28.1133333333333+1.33627591961142	15.6947976666667+1.13788782635299	0.000254573	synthesis
	Lgals9	13.62+2.34245597610713	7.40025333333333+1.77483155155337	0.0214736	secretion
	Pnp	145.63+3.10167696577191	110.066332666667+11.1527134912926	0.00600073	synthesis
	Slc17a1	44.01+4.75296749410303	54.4907123333333+6.00393451704921	0.076769	secretion
	Slc22a12	396.986666666667+33.7668037180503	285.081171666667+43.3800665201218	0.0243215	intake
	Slc22a13	11.6666666666667+3.24666495550948	3.41580933333333+0.0535692542166989	0.011681	intake
	Slc22a6	541.926666666667+36.0382440378736	505.828755666666+51.180713393107	0.374397	secretion
	Slc22a8	395.776666666667+47.3050677341586	433.381581333333+31.8563228538974	0.317149	intake
	Slc2a6	1.02666666666667+0.0568624070307733	0.876009666666666+0.0938400454621234	0.0761377	intake
	Slc2a9	7.20666666666667+0.361155552820849	7.624633+0.374575956626953	0.236517	intake
	Uox	0.0333333333333333+0.0577350269189626	0.00833133333333333+0.0144302926281255	0.50712	degradation
	Xdh	35.4533333333333+3.79014951332178	37.9539273333333+3.83896402144937	0.467053	synthesis
	Gda	5.74333333333333+1.53206831875518	8.231213+1.25247831214916	0.0950022	synthesis

## Sheet: liver
Gene ID	Gene Name	Product	FPKM(WT1)	FPKM(WT3)	FPKM(WT2)	FPKM (Uox-/-1)	FPKM (Uox-/-2)	FPKM (Uox-/-3)	mean(WT)	mean(Uox-/-)	T-test	SDWT	SDUox	Pos.	note	signal
ENSRNOG00000010064	Abcc4	ATP-binding cassette%2C subfamily C (CFTR/MRP)%2C member 4 [Source:RGD Symbol;Acc:620266]	1.97	2.01	1.81	0.908178	0.938178	0.656906	1.93	0.834421	0.000533638	0.10583	0.154462	15[-]103696557-103927592	secretion	+
ENSRNOG00000007041	Abcg2	ATP-binding cassette%2C subfamily G (WHITE)%2C member 2 [Source:RGD Symbol;Acc:631345]	11.84	10.81	8.93	8.45249	7.29888	3.91797	10.5267	6.55645	0.0687123	1.47555	2.35666	4[+]88832178-88890621	secretion	+
ENSRNOG00000010265	Ada	adenosine deaminase [Source:RGD Symbol;Acc:2031]	3.64	2.47	3.34	1.80857	2.05894	1.56004	3.15	1.80918	0.0241151	0.607701	0.249451	3[-]160115842-160139947	synthesis	+
ENSRNOG00000015354	Aox1	aldehyde oxidase 1 [Source:RGD Symbol;Acc:620528]	158.45	119.35	165.79	31.1283	33.1953	38.1435	147.863	34.1557	0.00145181	24.9645	3.6049	9[+]64929721-65007870	synthesis	+
ENSRNOG00000014405	Aprt	adenine phosphoribosyl transferase [Source:RGD Symbol;Acc:1307758]	38.43	43.24	39.72	47.3821	42.5717	48.093	40.4633	46.0156	0.0693173	2.48967	3.00363	19[-]55387288-55389256	synthesis	+
ENSRNOG00000048561	Hprt1	hypoxanthine phosphoribosyltransferase 1 [Source:RGD Symbol;Acc:2826]	24.77	18.14	20.42	22.6194	25.2468	16.477	21.11	21.4477	0.922131	3.36843	4.50076	X[-]158197149-158228749	synthesis	+
ENSRNOG00000012681	Lgals9	lectin%2C galactoside-binding%2C soluble%2C 9 [Source:RGD Symbol;Acc:3005]	91.68	93.46	126.28	44.1425	55.8714	54.1254	103.807	51.3798	0.0113968	19.4828	6.32814	10[+]64737022-64760201	secretion	+
ENSRNOG00000009982	Pnp	purine nucleoside phosphorylase [Source:RGD Symbol;Acc:1597189]	195.97	179.78	216.53	136.607	145.585	102.213	197.427	128.135	0.0150414	18.4183	22.8933	15[+]27875911-27883350	synthesis	+
ENSRNOG00000042692	Slc17a1	solute carrier family 17 (organic anion transporter)%2C member 1 [Source:RGD Symbol;Acc:620099]	25.9	12.85	17.95	16.161	15.6547	19.1136	18.9	16.9764	0.651534	6.57666	1.86812	17[-]43477600-43504604	secretion	+
ENSRNOG00000021108	Slc22a12	solute carrier family 22 (organic anion/urate transporter)%2C member 12 [Source:RGD Symbol;Acc:621628]	0.07	0	0	0.012493	0.010722	0	0.0233333	0.00773833	0.545785	0.0404145	0.00675984	1[-]221910767-221919301	intake	+
ENSRNOG00000056476	Slc22a13	solute carrier family 22 (organic anion/urate transporter)%2C member 13 [Source:RGD Symbol;Acc:1306840]	0	0	0	0.010491	0.023329	0.090371	0	0.041397	0.169935	0	0.0428957	8[-]127885268-127900463	intake	+
ENSRNOG00000018215	Slc22a6	solute carrier family 22 (organic anion transporter)%2C member 6 [Source:RGD Symbol;Acc:69338]	0.18	0.38	0.18	0.174947	0.084415	0	0.246667	0.086454	0.12794	0.11547	0.0874913	1[+]224824799-224833259	secretion	+
ENSRNOG00000018086	Slc22a8	solute carrier family 22 (organic anion transporter)%2C member 8 [Source:RGD Symbol;Acc:632286]	160.05	173.57	152.54	95.7613	79.9173	2.69173	162.053	59.4568	0.0251295	10.6572	49.7942	1[+]224800252-224818482	intake	+
ENSRNOG00000005900	Slc2a6	solute carrier family 2 (facilitated glucose transporter)%2C member 6 [Source:RGD Symbol;Acc:1309317]	0.67	0.58	0.7	0.422577	0.360421	0.45022	0.65	0.411073	0.00594199	0.06245	0.0459916	3[-]5568321-5575136	intake	+
ENSRNOG00000005302	Slc2a9	solute carrier family 2 (facilitated glucose transporter)%2C member 9 [Source:RGD Symbol;Acc:1597012]	8.86	12.01	11.79	12.3378	11.8711	13.9782	10.8867	12.7291	0.199393	1.75859	1.10671	14[+]77067503-77192702	intake	+
ENSRNOG00000016339	Uox	urate oxidase [Source:RGD Symbol;Acc:621369]	472.35	317.41	363.99	146.404	97.1123	174.385	384.583	139.3	0.00868	79.4963	39.123	2[+]252452269-252488396	degradation	+
ENSRNOG00000007081	Xdh	xanthine dehydrogenase [Source:RGD Symbol;Acc:62043]	30.28	33.72	32.25	22.9058	28.7128	24.5197	32.0833	25.3795	0.0283837	1.72605	2.99743	6[-]25149235-25211494	synthesis	+
ENSRNOG00000018282	Gda	guanine deaminase [Source:RGD Symbol;Acc:621617]	13.55	14.81	10.81	11.8424	15.7445	16.1582	13.0567	14.5817	0.447433	2.04512	2.3813	K01487-ko00230 Purine metabolism	synthesis	+
	Gene Name	mean(WT)	mean(Uox-/-)	T-test	note
	Abcc4	1.93+0.105830052442584	0.834420666666667+0.154462269377778	0.000533638	secretion
	Abcg2	10.5266666666667+1.47554509701783	6.55644666666667+2.35666331328541	0.0687123	secretion
	Ada	3.15+0.607700584169544	1.80918333333333+0.249450558157998	0.0241151	synthesis
	Aox1	147.863333333333+24.9645054694328	34.1556946666667+3.60490478373678	0.00145181	synthesis
	Aprt	40.4633333333333+2.48966530548452	46.0155806666667+3.0036339008981	0.0693173	synthesis
	Hprt1	21.11+3.36842693256068	21.447743+4.50076102356336	0.922131	synthesis
	Lgals9	103.806666666667+19.4828163604069	51.3797646666666+6.32814157772165	0.0113968	secretion
	Pnp	197.426666666667+18.4182527220508	128.135070666667+22.8933267939784	0.0150414	synthesis
	Slc17a1	18.9+6.57666328771664	16.9764303333333+1.86811589437335	0.651534	secretion
	Slc22a12	0.0233333333333333+0.0404145188432738	0.00773833333333333+0.00675984188671106	0.545785	intake
	Slc22a13	0+0	0.041397+0.0428957231900804	0.169935	intake
	Slc22a6	0.246666666666667+0.115470053837925	0.086454+0.0874913215296237	0.12794	secretion
	Slc22a8	162.053333333333+10.6571681667004	59.4567773333333+49.7941839750038	0.0251295	intake
	Slc2a6	0.65+0.062449979983984	0.411072666666667+0.0459916010194615	0.00594199	intake
	Slc2a9	10.8866666666667+1.75858844910722	12.7290576666666+1.10670595546162	0.199393	intake
	Uox	384.583333333333+79.4963202502693	139.300338666667+39.1230400175578	0.00868	degradation
	Xdh	32.0833333333333+1.72604557684127	25.3794563333333+2.99743157648299	0.0283837	synthesis
	Gda	13.0566666666667+2.04512428310196	14.5817113333333+2.38129782951784	0.447433	synthesis
